# Supplementary material for: A new Schiff-based chemosensor for chromogenic sensing of Cu2+, Co2+and S2−in aqueous solution: experimental and theoretical studies
Source: Royal Society of Chemistry journal article supplement (doi:10.1039/c7nj00054e), 2017-01-01
Supplement: c7nj00054e1.pdf [file c7nj00054e1.pdf]

## Supporting Information

### **A new Schiff-based chemosensor for chromogenic sensing of Cu<sup>2+</sup>, Co<sup>2+</sup> and S<sup>2-</sup> in aqueous solution: experimental and theoretical studies**

Cheol Hong Min,<sup>a</sup> Sangkyun Na,<sup>a</sup> Jae Eun Shin,<sup>a</sup> Jae Kyun Kim,<sup>a</sup> Tae Geun Jo,<sup>b\*</sup> Cheal Kim<sup>\*a,b</sup>

<sup>a</sup> *Nowon Institute of Education for The Gifted at Seoultech, Seoul National University of Science and Technology, Seoul 139-743, Korea*

*Department of Fine Chemistry and Department of Interdisciplinary Bio IT Materials, Seoul National University of Science and Technology, Seoul 139-743, Republic of Korea. Fax: +82-2-973-9149; Tel: +82-2-970-6693; E-mail: [jtgjjj@nate.com](mailto:jtgjjj@nate.com) and [chealkim@seoultech.ac.kr](mailto:chealkim@seoultech.ac.kr)*

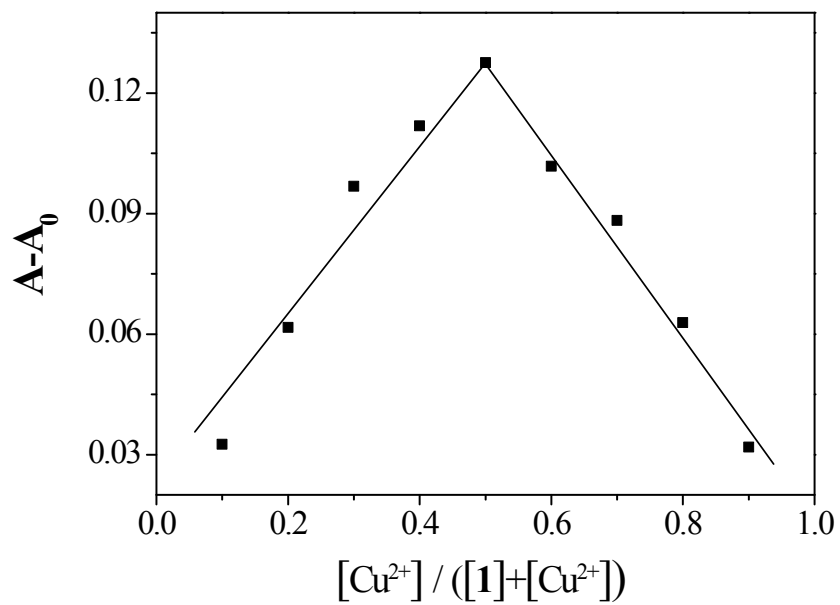

**Fig. S1** Job plot of **1** (40  $\mu\text{M}$ ) with  $\text{Cu}^{2+}$ , where the absorbance at 409 nm was plotted against the mole fraction of  $\text{Cu}^{2+}$ .

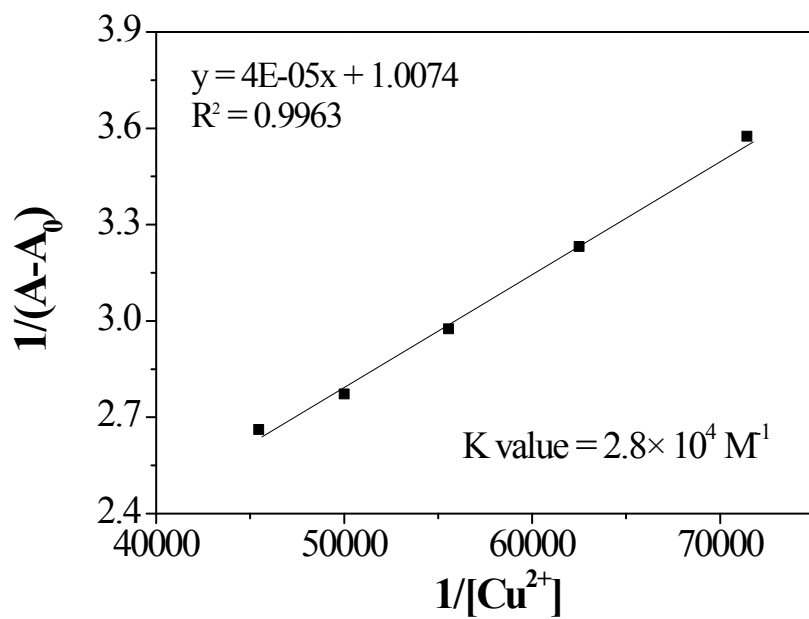

**Fig. S2** Benesi-Hildebrand plot of **1** (20  $\mu$ M) for  $Cu^{2+}$ , assuming 1:1 stoichiometry for association of **1** with  $Cu^{2+}$ .

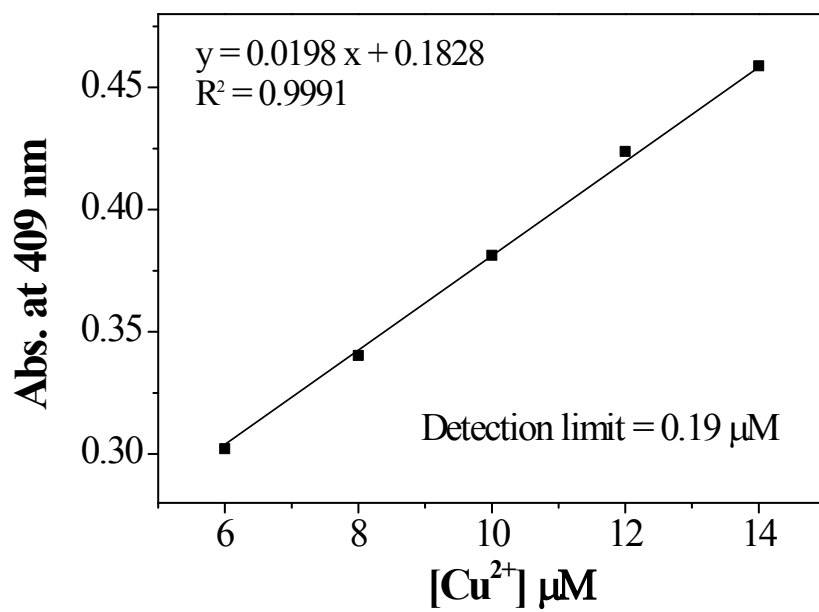

**Fig. S3** Determination of the detection limit of **1** ( $20 \mu\text{M}$ ) for  $\text{Cu}^{2+}$  based on change of absorbance at 409 nm.

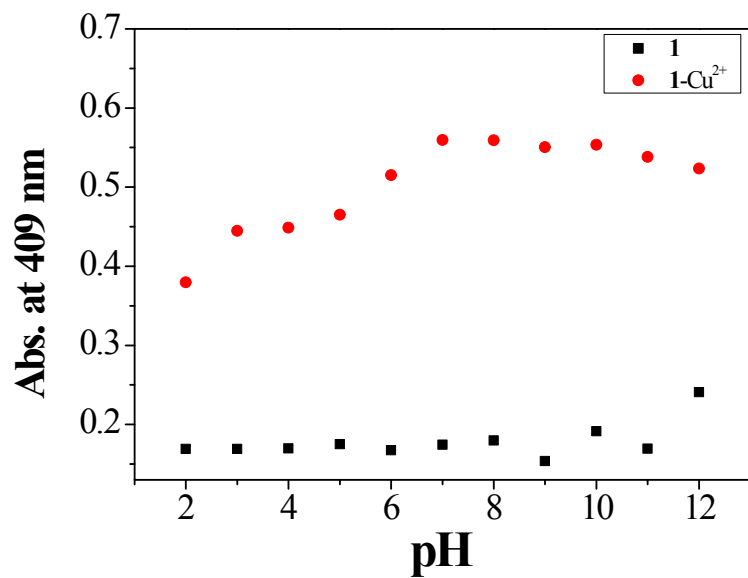

**Fig. S4** UV-vis absorbance changes (at 409 nm) of **1** (20  $\mu$ M) and **1-Cu<sup>2+</sup>** complex, respectively, in different pH (2-12) solutions (bis-tirs buffer/THF (1/1, v/v)).

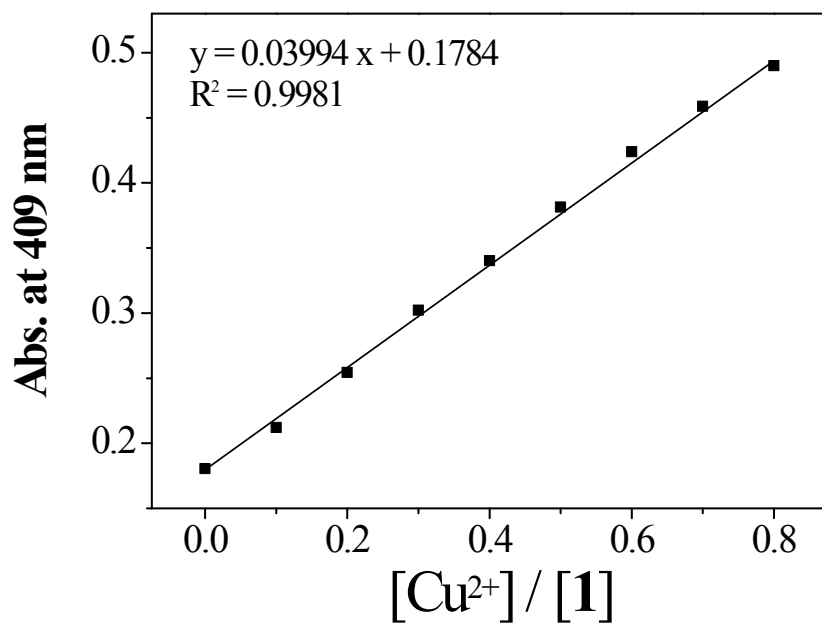

**Fig. S5** UV-vis absorbance (at 409 nm) of **1** as a function of  $\text{Cu}^{2+}$  concentration.  $[\mathbf{1}] = 20 \mu\text{M}$  and  $[\text{Cu}^{2+}] = 0\text{-}16 \mu\text{M}$ .

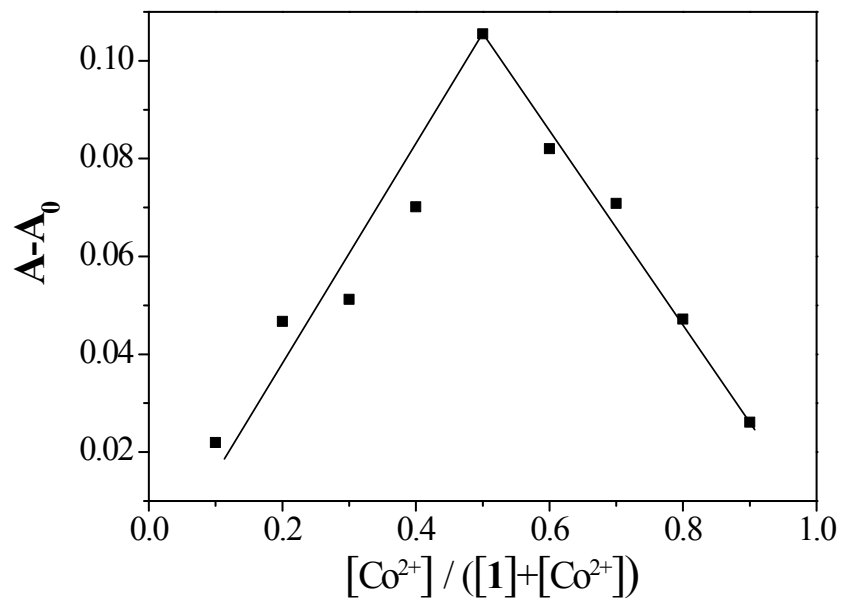

**Fig. S6** Job plot of **1** (40  $\mu\text{M}$ ) with  $\text{Co}^{2+}$ , where the absorbance at 427 nm was plotted against the mole fraction of  $\text{Co}^{2+}$ .

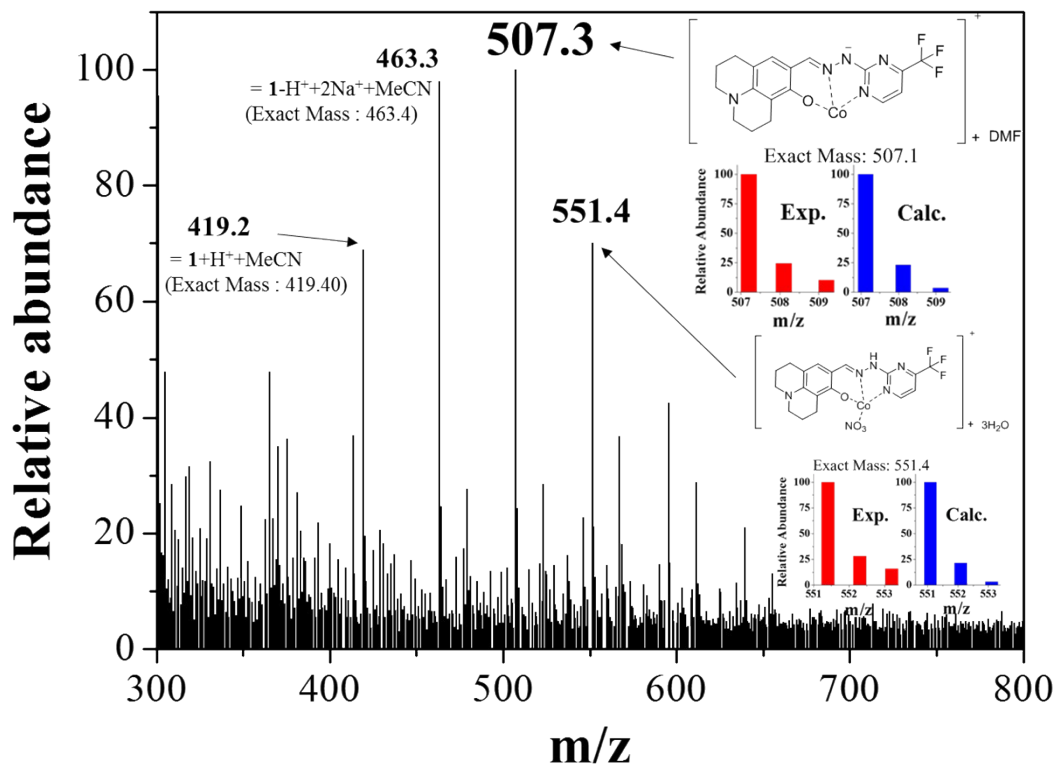

Fig. S7 Positive-ion ESI-mass spectrum of **1** (100  $\mu$ M) upon addition of 1 equiv of Co<sup>2+</sup>.



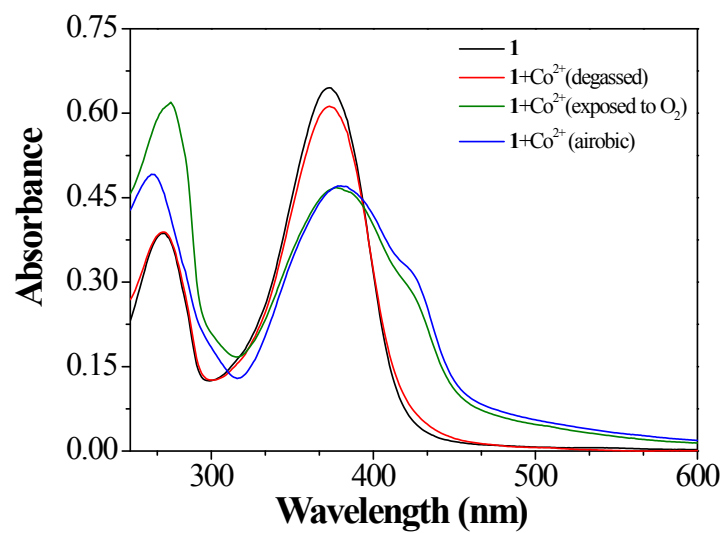

**Fig. S8** Absorption spectra of **1** (20  $\mu$ M), **1**-Co<sup>2+</sup> complex under the degassed and exposure-to-air conditions, and **1**-Co<sup>2+</sup> complex under aerobic conditions, respectively.

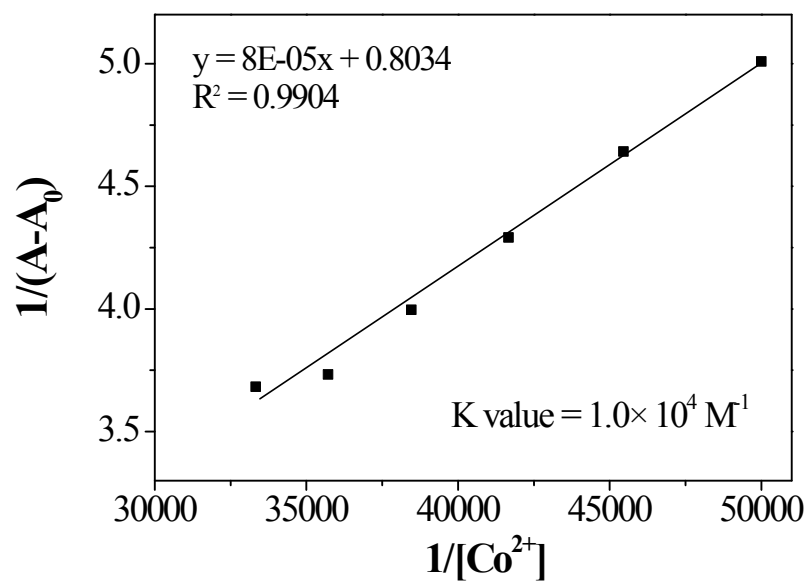

**Fig. S9** Benesi-Hildebrand plot of **1** (20  $\mu\text{M}$ ) for  $\text{Co}^{2+}$ , assuming 1:1 stoichiometry for association of **1** with  $\text{Co}^{2+}$ .

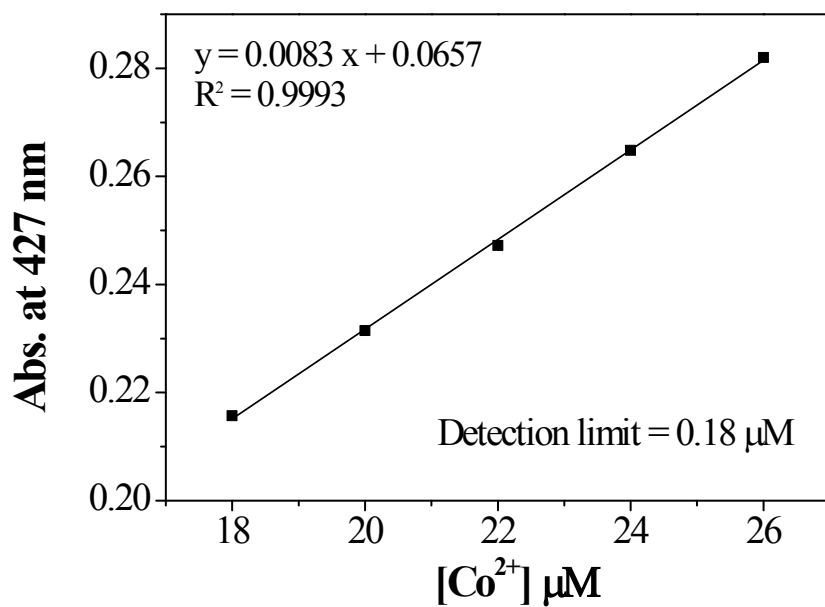

**Fig. S10** Determination of the detection limit of **1** (20  $\mu\text{M}$ ) for  $\text{Co}^{2+}$  based on change of absorbance at 427 nm.

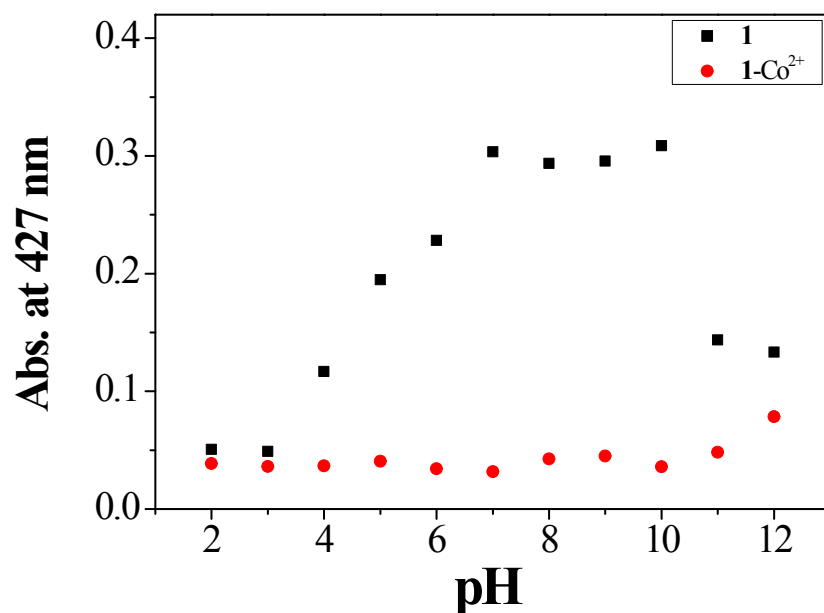

**Fig. S11** UV-vis absorbance changes (at 427 nm) of **1** (20  $\mu$ M) and **1-Co<sup>2+</sup>** complex, respectively, in different pH (2-12) solution (bis-tirs buffer/THF (1/1, v/v)).

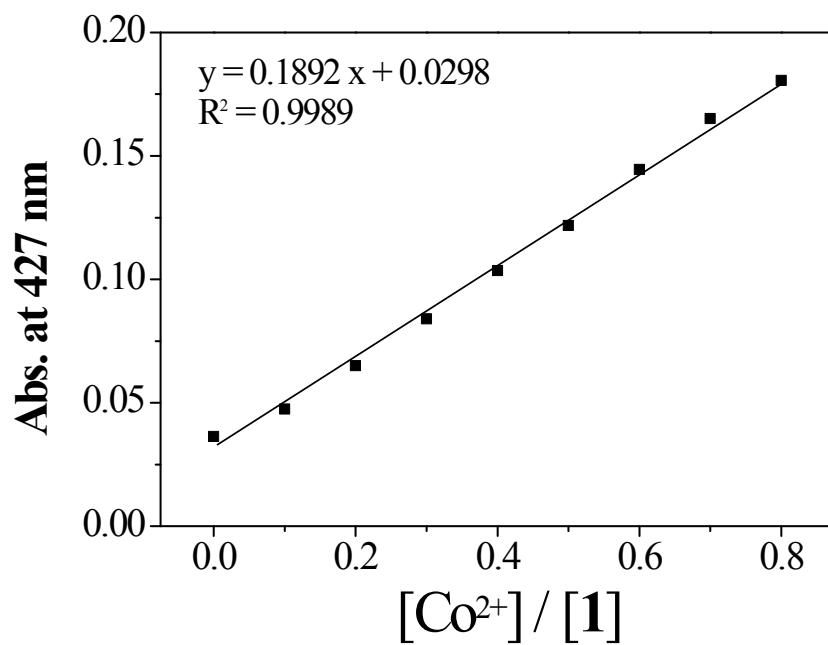

**Fig. S12** UV-vis absorbance (at 427 nm) of **1** as a function of  $Co^{2+}$  concentration.  $[1] = 20 \mu M$  and  $[Co^{2+}] = 0-16 \mu M$ .

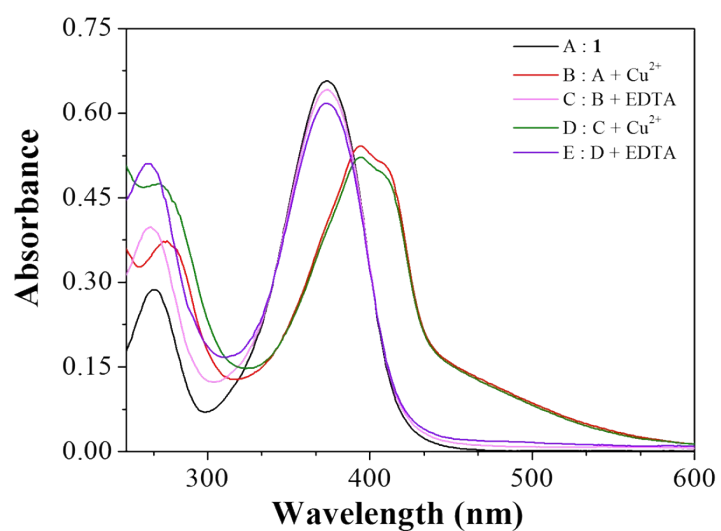

(a)

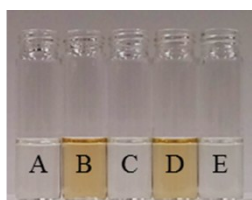

(b)

**Fig. S13** (a) UV-vis spectral and (b) color changes of **1** (20  $\mu\text{M}$ ) after the sequential addition of  $\text{Cu}^{2+}$  (1.2 equiv) and EDTA (1.8 equiv).

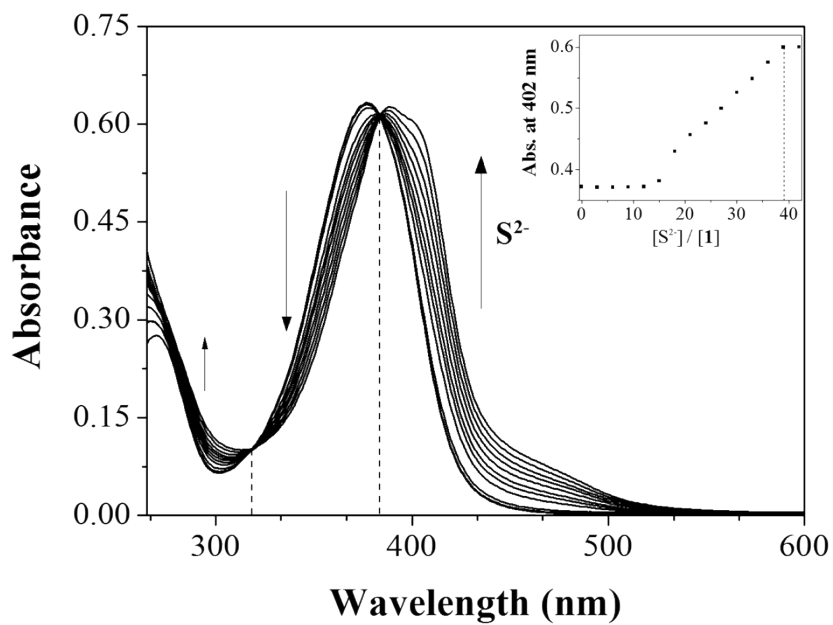

**Fig. S14** UV-vis spectral change of **1** (20 μM) with S<sup>2-</sup> (0-42 equiv) in bis-tris buffer/DMSO (1/9, v/v).

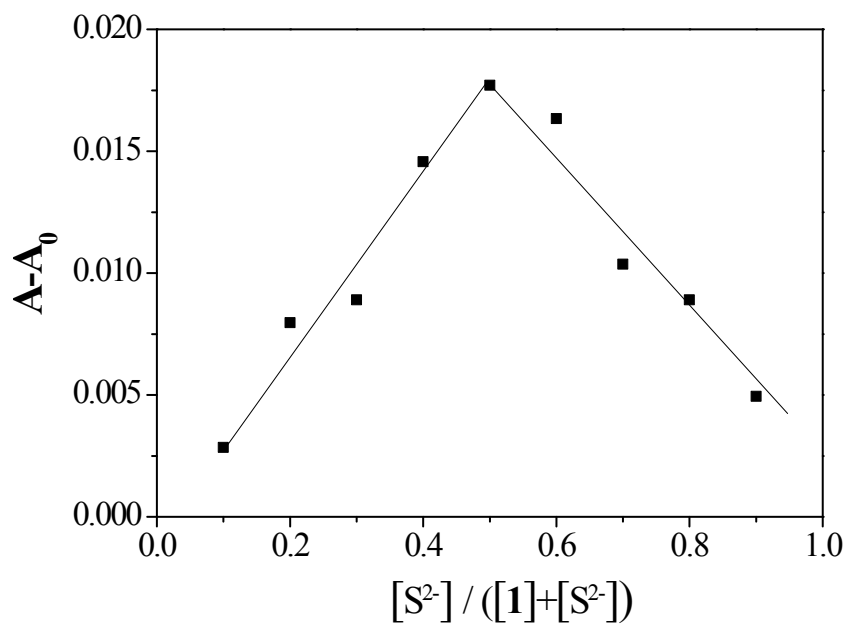

**Fig. S15** Job plot of **1** (100  $\mu\text{M}$ ) with  $S^{2-}$ , where the absorbance at 402 nm was plotted against the mole fraction of  $S^{2-}$ .



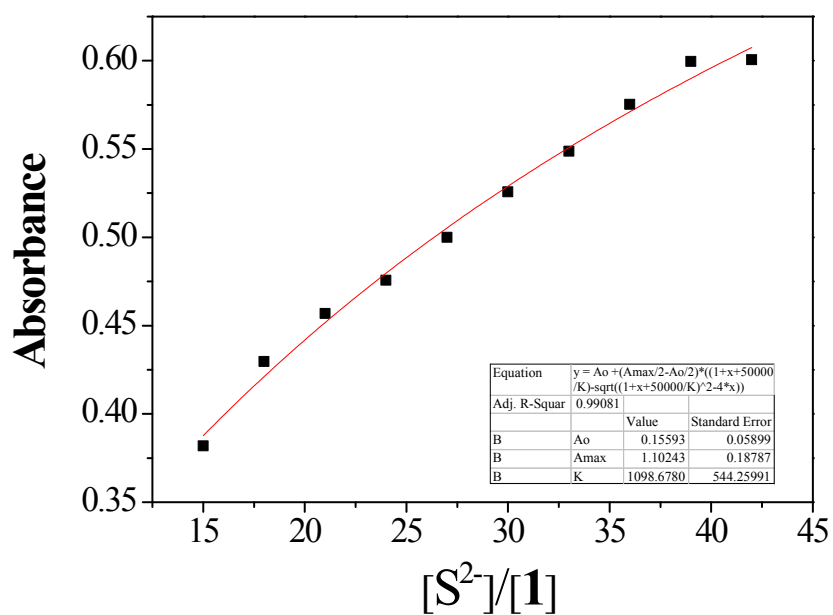

**Fig. S16** UV-vis absorbance of **1** (20  $\mu\text{M}$ ) after addition of increasing different concentration of  $\text{S}^{2-}$ . The red line is the non-linear fitting curve between **1** and  $\text{S}^{2-}$ . Association constant ( $K$ ) of **1** with  $\text{S}^{2-}$  was calculated by non-linear least square curve fitting.

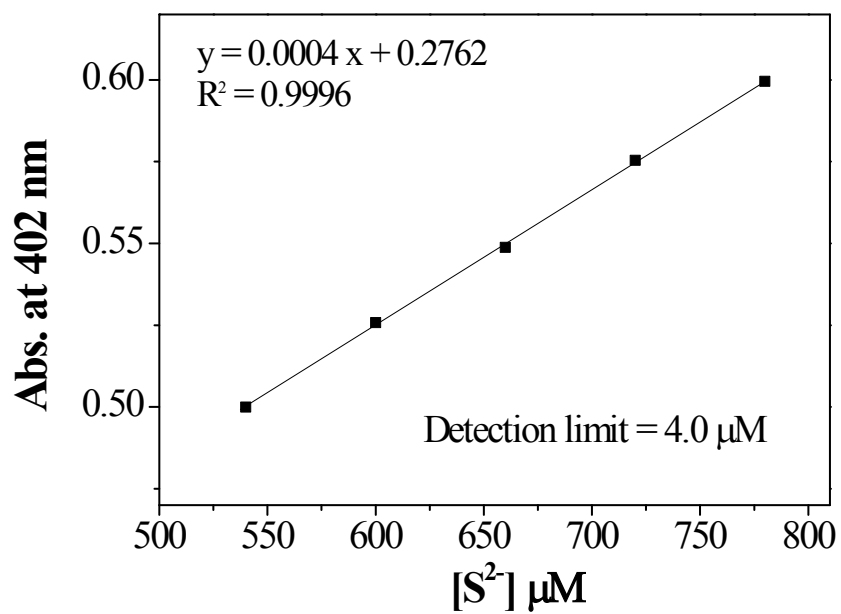

**Fig. S17** Determination of the detection limit of **1** (20 μM) for S<sup>2-</sup> based on change of absorbance at 402 nm.

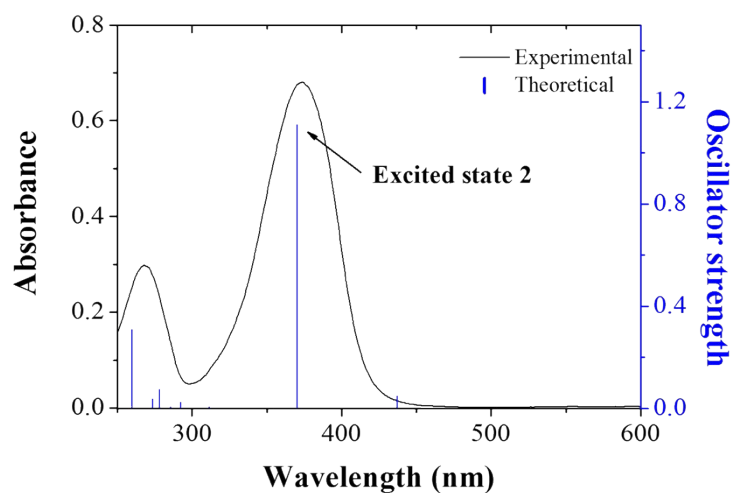

(a)

| Excited State 2 | Wavelength | Percent (%) | Character | Oscillator strength |
|-----------------|------------|-------------|-----------|---------------------|
| H → L+1         | 370.18     | 97%         | ICT       | 1.111               |

(b)

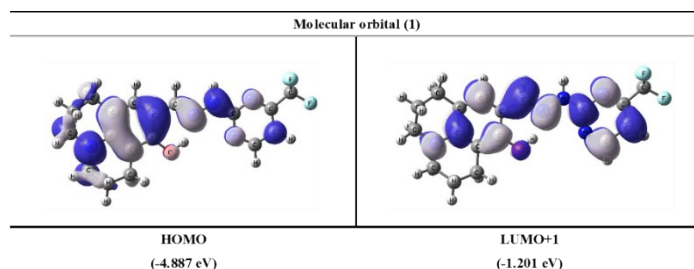

(c)

**Fig. S18** (a) Blue bars are the theoretical excitation energies (TD-DFT method) and black curve is the experimental UV-vis spectrum of **1**. (b) The major electronic transition energy and molecular orbital contribution for **1** (H = HOMO and L = LUMO). (c) Isosurface (0.030 electron bohr<sup>3</sup>) of molecular orbitals participating in the major singlet excited state of **1**.

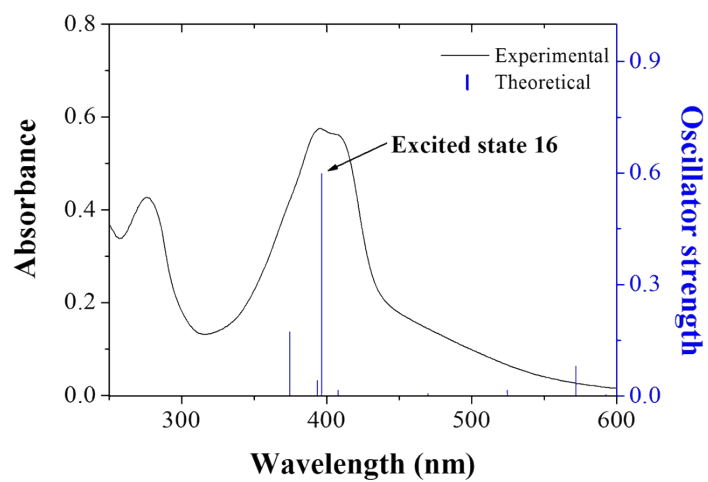

(a)

| Excited State 16                                | Wavelength | percent (%) | Character | Oscillator strength |
|-------------------------------------------------|------------|-------------|-----------|---------------------|
| H ( $\alpha$ ) $\rightarrow$ L+2 ( $\alpha$ )   | 396.84     | 36%         | ICT       | 0.598               |
| H ( $\beta$ ) $\rightarrow$ L+3 ( $\beta$ )     |            | 37%         | ICT       |                     |
| H-4 ( $\beta$ ) $\rightarrow$ L ( $\beta$ )     |            | 4%          | LMCT      |                     |
| H-1 ( $\beta$ ) $\rightarrow$ L+2 ( $\beta$ )   |            | 4%          | LMCT      |                     |
| H-25 ( $\beta$ ) $\rightarrow$ L ( $\beta$ )    |            | 3%          | LMCT      |                     |
| H-1 ( $\alpha$ ) $\rightarrow$ L+2 ( $\alpha$ ) |            | 2%          | ICT       |                     |
| H-1 ( $\beta$ ) $\rightarrow$ L+3 ( $\beta$ )   |            | 2%          | ICT       |                     |
| H-2 ( $\beta$ ) $\rightarrow$ L ( $\beta$ )     |            | 2%          | LMCT      |                     |

(b)

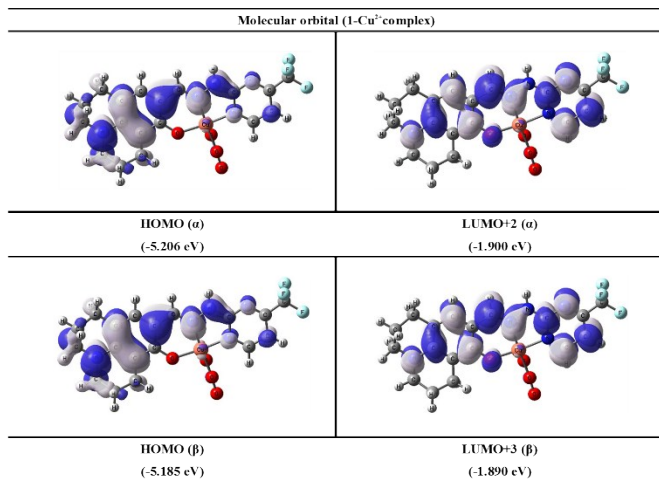

(c)

**Fig. S19** (a) Blue bars are the theoretical excitation energies (TD-DFT method) and black curve is the experimental UV-vis spectrum of **1-Cu<sup>2+</sup>**. (b) The major electronic transition energies and molecular orbital contributions for **1-Cu<sup>2+</sup>** (H = HOMO and L = LUMO). (c) Isosurface (0.030 electron bohr<sup>3</sup>) of molecular orbitals participating in the major singlet excited state of **1-Cu<sup>2+</sup>**.

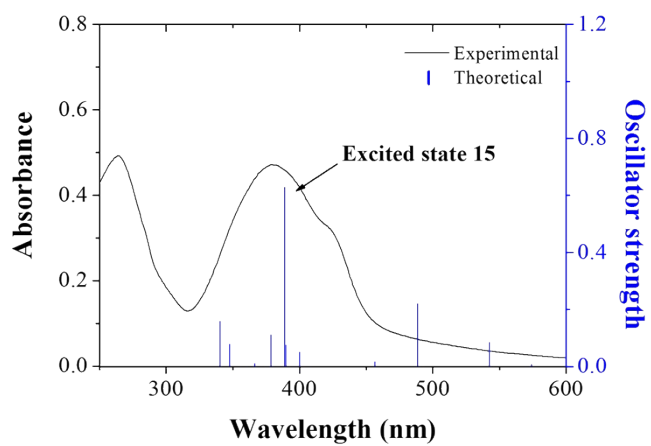

(a)

| Excited State 16 | Wavelength | Percent (%) | Character | Oscillator strength |
|------------------|------------|-------------|-----------|---------------------|
| H → L+5          | 390.81     | 64%         | LMCT      | 0.6878              |
| H-1 → L+4        |            | 16%         | ICT, LMCT |                     |
| H-3 → L          |            | 3%          | ICT, LMCT |                     |
| H → L+4          |            | 3%          | ICT, LMCT |                     |

(b)

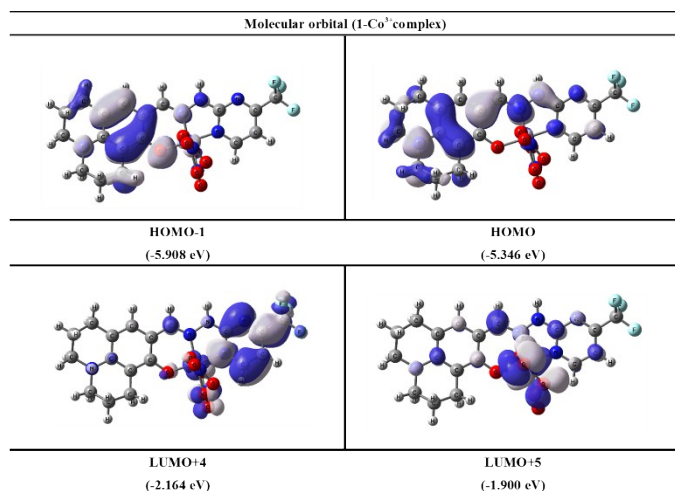

(c)

**Fig. S20** (a) Blue bars are the theoretical excitation energies (TD-DFT method) and black curve is the experimental UV-vis spectrum of **1-Co<sup>3+</sup>**. (b) The major electronic transition energies and molecular orbital contributions for **1-Co<sup>3+</sup>** (H = HOMO and L = LUMO). (c) Isosurface (0.030 electron bohr<sup>3</sup>) of molecular orbitals participating in the major singlet excited state of **1-Co<sup>3+</sup>**.

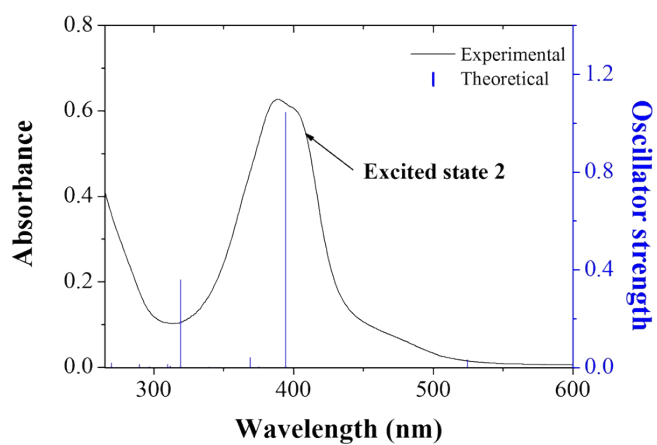

(a)

| Excited State 2 | Wavelength | Percent (%) | Character | Oscillator strength |
|-----------------|------------|-------------|-----------|---------------------|
| H → L+1         | 394.47     | 97%         | ICT       | 1.046               |

(b)

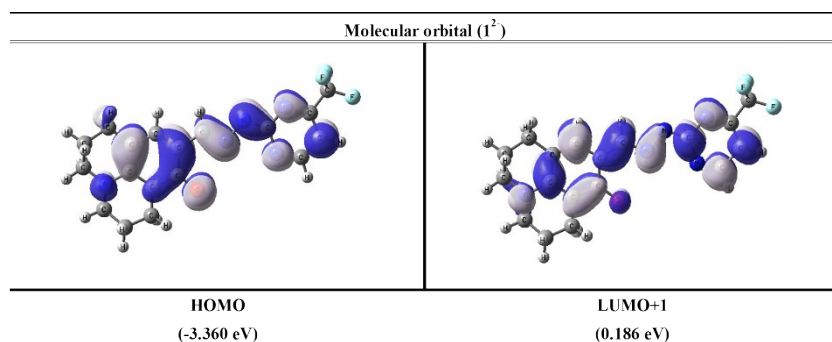

(c)

**Fig. S21** (a) Blue bars are the theoretical excitation energies (TD-DFT method) and black curve is the experimental UV-vis spectrum of  $1^{2-}$ . (b) The major electronic transition energy and molecular orbital contribution for  $1^{2-}$  (H = HOMO and L = LUMO). (c)



Isosurface (0.030 electron bohr <sup>3</sup>) of molecular orbitals participating in the major singlet excited state of **1**<sup>2-</sup>.
